# Supplementary material
Source: PubMed Central journal article supplement (PMC10022308)
Supplement: NIHMS1867056-supplement-Supplementary_Figure_3.pdf [file NIHMS1867056-supplement-Supplementary_Figure_3.pdf]

Desikan Model

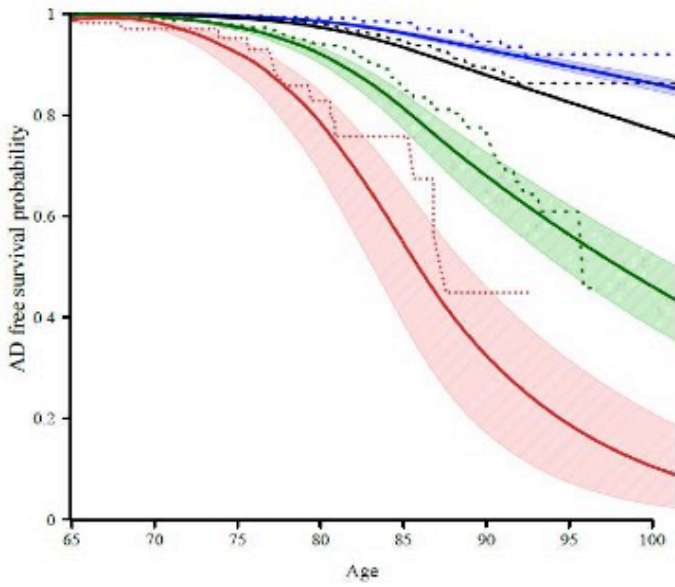

(A)

Desikan Nordic Model

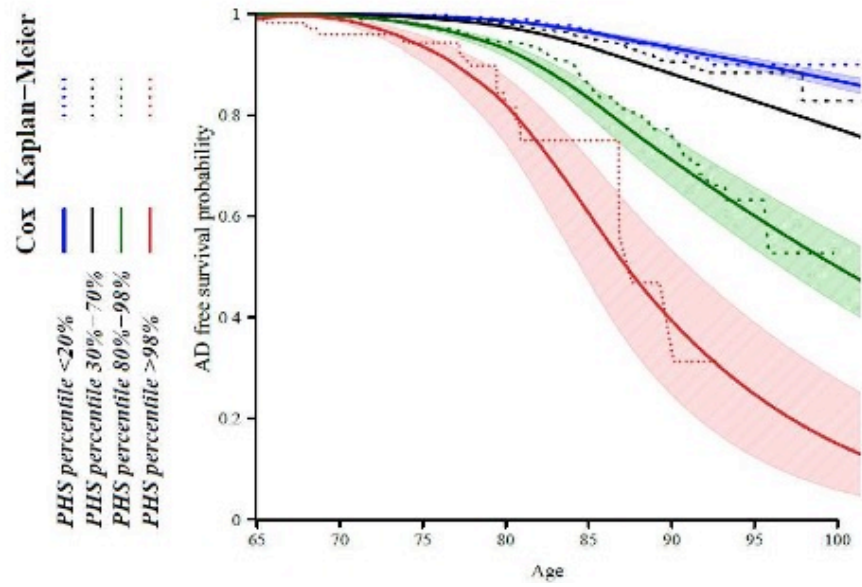

(B)

**Supplementary Figure 3.** Cumulative survival with age in the Danish CGPS population for different polygenic hazard score percentiles predicted by A) Desikan and B) Desikan Nordic PHS model. The solid lines show the survival estimated by Cox proportional hazards assumption, with 95% confidence intervals shown shaded, and the dashed lines show Kaplan-Meier
