# Supplementary material
Source: PubMed Central journal article supplement (PMC10022308)

### Desikan Model

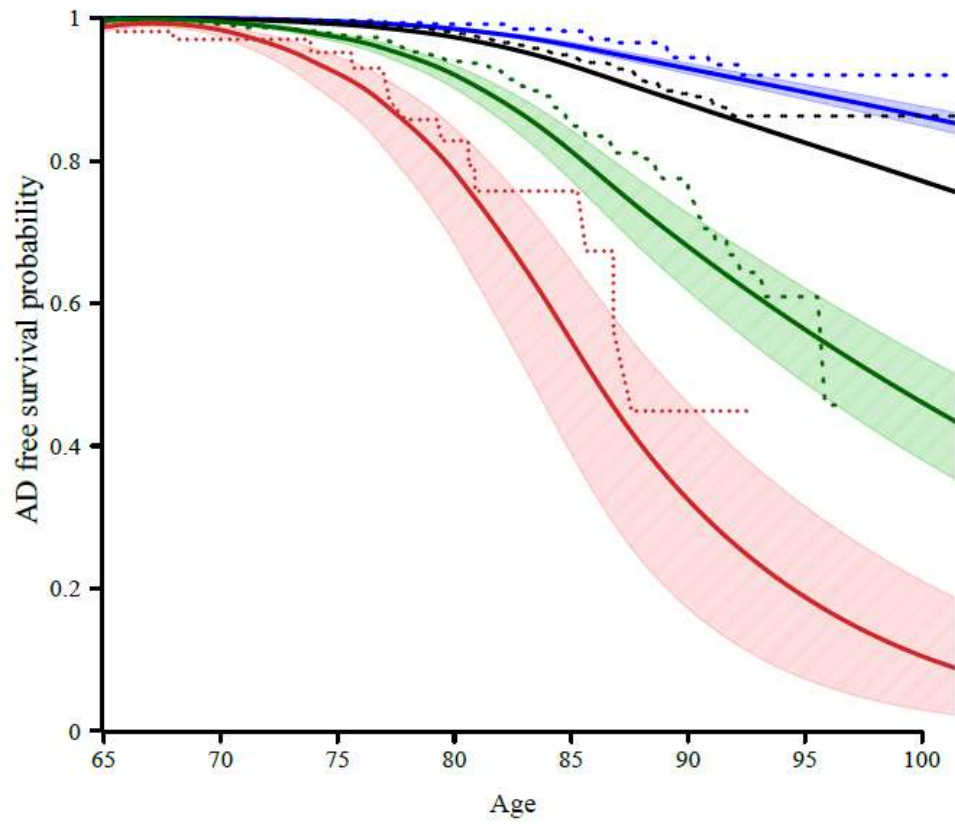

Cox Kaplan-Meier

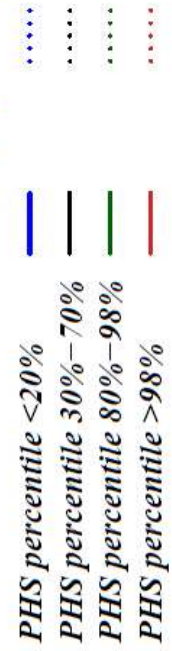

### Desikan Nordic Model

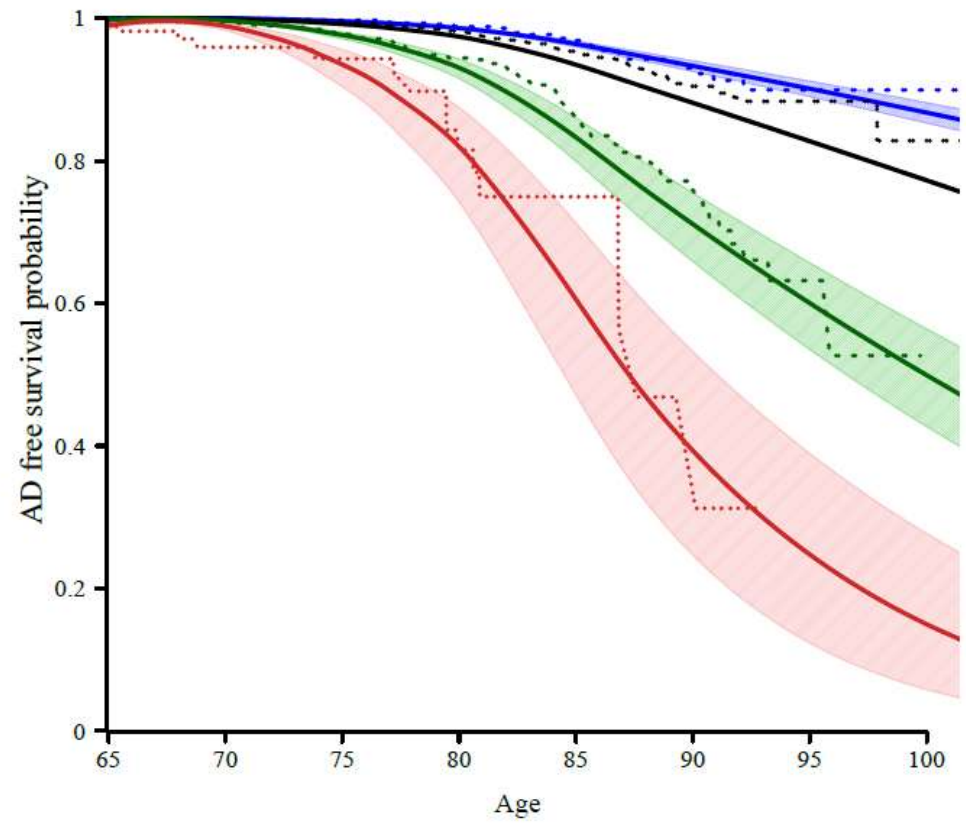

Supplement: NIHMS1867056-supplement-Supplementary_Figure_2.pdf [file NIHMS1867056-supplement-Supplementary_Figure_2.pdf]
